# Supplementary material
Source: HighWire-hosted journal article supplement (https://www.cmajopen.ca/highwire/filestream/80898/field_highwire_adjunct_files/0/open-2016-0042-original-submission.pdf)
Supplement: open-2016-0042-original-submission.pdf [file open-2016-0042-original-submission.pdf]

1  
2  
3  
4  
5  
6  
7  
8  
9  
10  
11  
12  
13  
14  
15  
16  
17  
18  
19  
20  
21  
22  
23  
24  
25  
26  
27  
28  
29  
30  
31  
32  
33

## Postoperative Health Services Use Before and After Implementation of a Provincial Bariatric Surgery Program in Ontario, Canada

Ahmad Elnahas MD MSc <sup>1,4</sup>, Timothy D. Jackson MD MPH <sup>1</sup>, Allan Okrainec MDCM  
MHPE <sup>1</sup>, Peter C. Austin PhD <sup>2,4</sup>, Chaim M. Bell MD PhD <sup>3,4</sup>, David R. Urbach MD MSc  
<sup>1,2,4</sup>

<sup>1</sup>Department of Surgery, University of Toronto, Toronto, Ontario, Canada

<sup>2</sup>Institute for Clinical Evaluative Sciences, Toronto, Ontario, Canada

<sup>3</sup>Department of Medicine, University of Toronto, Toronto, Ontario, Canada

<sup>4</sup>Institute of Health Policy, Management and Evaluation, University of Toronto, Toronto,  
Ontario, Canada

### Correspondence:

David Urbach, MD, MSc

Division of General Surgery, University of Toronto

Toronto General Hospital - University Health Network

200 Elizabeth Street

Toronto, Ontario

Canada M5G 2C4

Tel: 416 340-4284 Fax: 416 340-4211

Email: [david.urbach@uhn.ca](mailto:david.urbach@uhn.ca)

1  
2  
3 **BACKGROUND:** In 2009, the Ontario Bariatric Network (OBN) was established to  
4 address the exploding demand for bariatric surgery services funded outside Canada. The  
5 impact of outsourcing bariatric surgery, which can lack appropriate follow-up, remains  
6 unexplored. Our study objective was to compare postoperative hospital services use  
7 among Ontario residents who received bariatric surgery before and after implementation  
8 of the OBN.  
9  
10  
11  
12  
13  
14  
15  
16  
17

18 **METHODS:** A population-based, before-and-after study using administrative data held  
19 at the Institute for Clinical Evaluative Sciences was conducted. All Ontario residents who  
20 underwent funded, first-time bariatric surgery were included in the study. Patients who  
21 received bariatric surgery within the 3-year period after (2010-2012) establishment of the  
22 OBN were compared to patients before (2007-2009). The primary outcome was hospital  
23 services use in Ontario within one year following surgery.  
24  
25  
26  
27  
28  
29  
30  
31  
32

33 **RESULTS:** A total of 5,617 and 6,896 patients received bariatric surgery before and  
34 after the OBN, respectively. After adjustment, implementation of the OBN was  
35 associated with fewer postoperative hospital services (rate ratio [RR] 0.83, 95% CI 0.78  
36 to 0.89,  $P < 0.001$ ), less intensive care (RR 0.53, 95% CI 0.35 to 0.81,  $P = 0.003$ ) and lower  
37 1-year mortality (odds ratio [OR] 0.44, 95% CI 0.23 to 0.82,  $P = 0.01$ ). No statistically  
38 significant differences were found in hospitalization or reoperation rates. The physician  
39 assessment rate was significantly higher after the OBN (RR 3.50, 95% CI 3.19 to 3.84,  
40  $P < 0.001$ ).  
41  
42  
43  
44  
45  
46  
47  
48  
49  
50  
51  
52

53 **CONCLUSION:** The implementation of a comprehensive and multidisciplinary  
54 provincial program to replace outsourcing bariatric surgical services was associated with  
55  
56  
57  
58  
59  
60

1  
2  
3 less postoperative hospital services use for Ontario residents undergoing bariatric  
4  
5  
6 surgery.  
7  
8  
9  
10  
11  
12  
13  
14  
15  
16  
17  
18  
19  
20  
21  
22  
23  
24  
25  
26  
27  
28  
29  
30  
31  
32  
33  
34  
35  
36  
37  
38  
39  
40  
41  
42  
43  
44  
45  
46  
47  
48  
49  
50  
51  
52  
53  
54  
55  
56  
57  
58  
59  
60

Confidential

## INTRODUCTION

The demand for weight loss procedures has grown significantly in recent years. In the late 1980's, there were 5,000 bariatric procedures performed worldwide, however this number grew to 350,000 by 2009 with 63% of the procedures performed in North America.[1, 2] Before 2009, bariatric surgery was not a widely available service in Canada, despite its growing popularity worldwide. Canadian hospitals are typically funded by global budgets and clinical programs such as bariatric surgery—that require additional hospital resources like new multidisciplinary allied health teams and purchase of new capital equipment—rarely gain traction unless they are supported by incremental revenue streams. The average wait period for bariatric surgery was close to five years, among the longest of any surgically treated condition in Canada.[3] As a result, Canadians began turning to private centres offering uninsured procedures or travelling out-of-country (OOC) for treatment as medical tourists.[4]

Initially, the Ontario Ministry of Health and Long-Term Care (MOHLTC), which funds health services in Ontario, denied coverage for OOC bariatric services since bariatric operations such as the Roux-en-Y gastric bypass (RYGB) and sleeve gastrectomy (SG) were insured, publicly-available health services in Ontario.[5] However, patients appealed successfully to the Ontario Health Services Appeal and Review Board, claiming that the long wait time for bariatric surgery made it functionally inaccessible.[6] As a result, the Ontario MOHLTC classified bariatric surgery as an eligible OOC Health Service in 2005 and established contracts with bariatric centres across the United States for OOC referrals.[7] Within a few years, over 1,660 OOC applications for bariatric surgery were granted annually, at a cost of over 50 million dollars.[8] The increasing cost

1  
2  
3 of OOC services and perceptions that follow-up care was poor, prompted the MOHLTC  
4 to create the Ontario Bariatric Network (OBN)—a network of Centers of Excellence for  
5 bariatric surgery in Ontario—in 2009.[8]  
6  
7

8  
9  
10  
11 Before the existence of the OBN, there was minimal surgical, medical, dietary or  
12 psychological supervision for Ontario residents who received bariatric surgery in the  
13 United States.[5] The lack of follow-up care could have delayed the diagnosis and  
14 treatment of postoperative complications, leading to unnecessary hospitalizations or  
15 emergency room visits. We sought to evaluate the impact of the OBN on postoperative  
16 hospital services utilization and clinical outcomes among Ontario residents who received  
17 bariatric surgery.  
18  
19  
20  
21  
22  
23  
24  
25  
26  
27  
28  
29  
30  
31

## 32 **METHODS**

### 33 **Study Design and Setting**

34  
35  
36 We conducted a retrospective, before-and-after study using administrative data held at the  
37 Institute for Clinical Evaluate Sciences (ICES) in Ontario, Canada. The study population  
38 consisted of Ontario residents who received a bariatric surgical procedure funded by the  
39 MOHLTC between January 1, 2007 and July 31, 2012. We compared the one-year  
40 postoperative health services utilization during two 3-year periods, before and after  
41 establishment of the OBN.  
42  
43  
44  
45  
46  
47  
48  
49  
50  
51  
52  
53  
54  
55  
56  
57  
58  
59  
60

## Data Sources

Data sources included the following: Ministry of Health and Long-term Care Out-of-Country Service (MOHLTC-OOC) database; Ontario Health Insurance Plan (OHIP) physician claims database; Canadian Institute for Health Information (CIHI) Discharge Abstract Database (DAD); National Ambulatory Care Reporting System (NACRS); and Registered Persons Database (RPDB). The MOHLTC-OOC database collected data on type, date and location of surgery for all Ontario residents who received OOC bariatric surgery funded by MOHLTC. The OHIP database provided details on all claims paid by OHIP to physicians including physician assessments, critical care services, and operative procedures. The CIHI-DAD contained information on the dates of hospitalizations and length of stay at acute care facilities in Ontario for all residents. The NACRS database captured information on emergency department visits and the RPDB provided demographic and vital status information on Ontario health cardholders.

## Implementation of the Ontario Bariatric Network

The Ontario Bariatric Network was established on April 1, 2009. The program defined eligibility criteria for bariatric surgery, established surgical and perioperative care standards, and centralized referrals to one of four provincial Bariatric Centers of Excellence (COEs). This program provided a chronic disease management model suitable for bariatric patients by recognizing the complexity and multidisciplinary issues surrounding obesity and its comorbidities.[9] Once established, the province effectively stopped funding patients to receive OOC bariatric surgery.

## Patient Selection

OOC surgery recipients were identified using the MOHLTC-OOC database and in-province recipients were identified using specific OHIP fee codes for bariatric surgery (RYGB or SG). For patients with more than one bariatric procedure during the study period, only the first operation was selected. Patients who underwent private or uninsured bariatric procedures were not included. Cohort selection was based on the date of surgery. To determine an estimate of the program's effect, patients in the three years after program implementation (2010 to 2012) were compared to the patients in the prior three years (2007-2009). Although, the OBN was established on April 1<sup>st</sup>, 2009, OBN-funded procedures did not start until January 1<sup>st</sup>, 2010.[8] The follow-up period for each patient started from the discharge date of the principal operation and ended 365 days after the date of surgery. The discharge date was unavailable for OOC surgery patients because we lacked records for hospitalizations occurring outside Ontario. The follow-up period for OOC patients therefore started at the time of return to Ontario, ensuring that the effective follow-up time was similar for both groups.

## Outcome Measures

The primary outcome of our study was the number of days where Ontario hospital services were used, which was a composite count of the number of emergency room visits and the total number of days admitted to hospital. Secondary outcomes included the number of days requiring care in an intensive care unit (ICU) and ventilatory support, as measured using per diem physician fee codes for critical care and ventilatory care.[10] All primary care physician or specialist assessments were identified based on physician

1  
2  
3 billing codes. Postoperative reoperations were identified using procedure fee codes for  
4  
5 abscess drainage, bowel obstruction, bowel resection, and feeding tube placement. We  
6  
7 also measured death within 30 days and one year of surgery.  
8  
9

## 10 11 **Statistical Analysis**

12  
13  
14 We compared the baseline patient characteristics between the two cohorts using t-tests  
15  
16 and chi-square tests as appropriate. Negative binomial (NB) regression was used to  
17  
18 estimate the effect of the OBN on the rate of health services use after adjusting for  
19  
20 potentially confounding variables. Logistic regression was used to estimate the effect of  
21  
22 the OBN on 30-day and 1-year mortality after accounting for baseline covariates. Models  
23  
24 included the following independent variables: age, sex, household income quintile in  
25  
26 neighborhood of residence (an ecologic measure of socioeconomic status), rurality (rural  
27  
28 vs. urban residence), type of bariatric procedure (RYGB vs. other), and the Johns  
29  
30 Hopkins Adjusted Clinical Groups (ACG) comorbidity score.[11, 12] All variables were  
31  
32 chosen *a priori* based on clinical relevance. No evidence of multicollinearity was  
33  
34 detected based on a variance inflation factor threshold of four.[13] Although, there were a  
35  
36 high number of zero counts in our outcome data, the assumptions of model fit were  
37  
38 satisfied using a conventional NB model with no improvement in model fit using a zero-  
39  
40 inflated NB model. Negative binomial regression results were presented as rate ratios  
41  
42 (RR) and logistic regression results as odds ratios (OR) with corresponding 95%  
43  
44 confidence intervals (CI). P-values less than 0.05 were considered statistically significant.  
45  
46  
47  
48  
49  
50  
51  
52 A sensitivity analysis was also performed using only in-province hospitals outside the  
53  
54 OBN to compare one-year postoperative health services utilization before and after 2010.  
55  
56  
57  
58 Analyses were conducted using SAS v9.3 for UNIX (SAS Institute Inc, Cary, NC). The  
59  
60



1  
2  
3 study protocol was approved by the research ethics board of Sunnybrook Health Sciences  
4  
5 Centre, University Health Network and the University of Toronto.  
6  
7  
8

## 9 10 **RESULTS**

### 11 12 13 **Patient Population**

14  
15  
16  
17 Overall, 5,617 and 6,896 patients had surgery before and after implementation of the  
18  
19 OBN, respectively. The groups were generally comparable with respect to demographic  
20  
21 and clinical characteristics (Table 1). There were small but statistically significant  
22  
23 differences in age and rurality. Furthermore, difference in ACG comorbidity score was  
24  
25 statistically significant but the histogram distribution of scores was quite similar (data not  
26  
27 shown). Women made up approximately 82% of the patient population. More than 80%  
28  
29 of patients in both groups resided in an urban location at the time of surgery. In addition,  
30  
31 the distribution of neighbourhood income quintile was similar across groups. The  
32  
33 proportion of RYGB operations was lower after the OBN was implemented (93.1% vs.  
34  
35 95.8%,  $P < .001$ ). Before program implementation, 78.1% of bariatric surgery was  
36  
37 performed OOC with approval by Ontario's MOH. All OOC surgeries were performed in  
38  
39 the United States. OOC surgery dropped to only 6.8% after program implementation and  
40  
41 likely represented patients already accepted for OOC services.  
42  
43  
44  
45  
46  
47

48  
49 There was a sharp decline in OOC cases after the implementation of the OBN in 2009,  
50  
51 associated with a corresponding increase in cases performed at OBN centres (Figure 1).  
52

53  
54 The very small number of bariatric cases performed in Ontario hospitals outside the OBN  
55  
56 remained unchanged throughout the study period.  
57  
58  
59  
60

## Health Services Utilization and Mortality

The proportion of patients who required at least one day of hospital services before the OBN was 54.0% compared to 50.1% after the OBN ( $P=0.001$ ) (Table 2). The proportion of patients requiring at least one postoperative hospitalization before and after the OBN was 26.8% and 28.4%, respectively ( $P=0.01$ ). The mean number of days spent in hospital during the year after surgery was 9.3 days before and 6.8 days after (mean difference 2.5 days, 95% CI 1.2 to 3.8). In both groups, just over 2% of patients were admitted to an ICU and approximately 1% required ventilator support. However, the mean number of days in the ICU among persons requiring an ICU stay was 11.1 before and 4.4 after (mean difference 6.7 days, 95% CI 3.1 to 10.3). While 7.6% of patients before the OBN underwent a physician assessment within one year following surgery, 32.2% of patients were assessed after the OBN was in place ( $P<.001$ ). There was no statistical difference in 30-day mortality (0.2% vs. 0.1%,  $P=0.36$ ), but the 1-year mortality was 0.5% and 0.2% in the before and after group, respectively ( $P=0.03$ ).

The adjusted risk of hospital services use was 0.83 (95% CI 0.78 to 0.89;  $P<.001$ ) after program implementation, representing a 17% reduction in the rate of hospital services (Table 3). There was also a significant decrease in the adjusted mean number of days admitted to an ICU (RR 0.53, 95% CI 0.35 to 0.81;  $P=0.003$ ) and on ventilator support (RR 0.37, 95% CI 0.19 to 0.71;  $P=0.003$ ). There was no statistical difference in the rate of hospitalization or reoperation. The rate of physician assessments was almost 3.5 times higher after the OBN was introduced (95% CI 3.19 to 3.84;  $P<.001$ ). The 1-year mortality was significantly lower after program implementation (adjusted OR 0.44, 95% CI 0.23 to 0.82;  $P=0.01$ ). The sensitivity analysis restricted to in-province hospitals outside the

1  
2  
3 OBN revealed no significant differences with the exception of the physician assessment  
4 rate when one-year postoperative health services use were compared before and after  
5  
6  
7  
8 2010.  
9

## 10 11 12 **DISCUSSION**

13  
14  
15  
16 In this study of 12,513 patients, bariatric surgery at a regionalized bariatric program was  
17 associated with less postoperative hospital and critical care services, along with a lower  
18  
19 1-year mortality. We found no evidence of reduced hospitalization or reoperation rates.  
20  
21 The physician assessment rate was significantly higher after implementation of the OBN,  
22  
23 presumably due to the program's model of care, which included intensive medical  
24  
25 follow-up.  
26  
27  
28  
29

30  
31 There is limited literature evaluating the impact of bariatric COE with respect to  
32  
33 postoperative health services utilization. Previous studies have focused mainly on  
34  
35 evaluating differences in clinical outcomes between bariatric COEs and non-COEs.  
36  
37 Accreditation of COEs has been emphasized in the United States, based primarily on  
38  
39 hospital volume and access to a dedicated multidisciplinary bariatric team.[14] An  
40  
41 evaluation of clinical outcomes 18 months before and after the Center for Medicare and  
42  
43 Medicaid Services (CMS) restricted bariatric surgery to COE revealed the policy decision  
44  
45 was associated with improved outcomes.[15] Patients who underwent bariatric surgery  
46  
47 after the CMS decision had significantly shorter length of hospital stay and a lower  
48  
49 overall complication rate, but not significantly lower mortality.[15] A recent study by  
50  
51 Morton et al using Nationwide Inpatient Sample data also showed that centre  
52  
53 accreditation improves bariatric surgery outcomes.[16] Other large population-based  
54  
55  
56  
57  
58  
59  
60

1  
2  
3 studies found no significant association between COE designation and clinical  
4  
5 outcomes.[17, 18] Among Medicare patients undergoing bariatric surgery, there was no  
6  
7 significant difference in the rates of complications and reoperation between COE and  
8  
9 non-COE hospitals.[19]  
10  
11

12  
13  
14 Our study differs with respect to the comparison group, which was composed primarily  
15  
16 of patients who received surgery out of country, and who may have experienced  
17  
18 difficulty finding local physicians to provide follow-up care. This lack of continuity of  
19  
20 care was unique to our study population, and could explain the higher use of hospital  
21  
22 services in the group having OOC surgery.  
23  
24

25  
26  
27 This was an observational study based on administrative data and as a result, there are  
28  
29 some limitations. We relied on coded administrative health data and the validity of  
30  
31 bariatric surgery codes has not been specifically evaluated. However, the Ontario  
32  
33 Schedule of Benefits does include specific fee codes for bariatric surgery and procedure  
34  
35 codes in Ontario health data are generally very reliable.[20, 21] Our data sources did not  
36  
37 have information on weight loss and resolution of comorbid conditions, which did not  
38  
39 allow us to comment on the effectiveness of surgery. Given our six-year study duration,  
40  
41 temporal factors improving surgical care over time, such as the wider application of  
42  
43 laparoscopic surgery, may have attributed to the program's effect. Due to the lack of a  
44  
45 Canadian bariatric control cohort outside Ontario, it was not possible to completely  
46  
47 isolate the effect of the OBN from temporal trends. To test this potential secular trend, we  
48  
49 performed a sensitivity analysis of in-province centres outside of OBN and found no  
50  
51 difference in the use of hospital services. Selection bias was also mitigated in our study  
52  
53 by including both OOC and in-province surgery recipients in our control group, since  
54  
55  
56  
57  
58  
59  
60

1  
2  
3 bariatric patients accepted for OOC services may have been systematically different from  
4  
5 patients who received surgery in Ontario.  
6  
7

8  
9 A major concern with “medical tourism” for bariatric surgery is the lack of continuity in  
10  
11 care to monitor postoperative complications and nutritional deficiencies. The importance  
12  
13 of follow-up care is further evident by the fact that bariatric surgery has long-term  
14  
15 effects, with weight reduction and correlated changes in comorbidities continuing for  
16  
17 months or even years after the procedure.[22] Unlike other types of surgical procedures,  
18  
19 the successful long-term treatment of morbid obesity and its associated comorbidities  
20  
21 requires a lifelong surgical, medical, psychological, and dietary care.[22] Dedicated  
22  
23 bariatric programs based on best practices and clinical standards of care can ensure that  
24  
25 patients consistently receive the safest and most effective care possible.[23] As well, the  
26  
27 opportunity to address concerns and complications in an outpatient setting can also  
28  
29 translate to a reduced need for hospital services. Our findings support the position  
30  
31 statement by the American Society of Metabolic and Bariatric Surgery (ASMBS) on  
32  
33 global bariatric healthcare, which discourages the “referral across international borders or  
34  
35 long distances for patients requesting bariatric surgery if a high-quality bariatric program  
36  
37 is available locally”. [24]  
38  
39  
40  
41  
42  
43  
44

45 In conclusion, we found that a comprehensive and multidisciplinary provincial bariatric  
46  
47 program provided an improved model of care when compared to outsourcing bariatric  
48  
49 surgical services by reducing the use of postoperative health services. Future research  
50  
51 should include an economic evaluation to determine the costs and benefits of this policy  
52  
53 decision.  
54  
55  
56  
57  
58  
59  
60

## REFERENCES

1. Buchwald H, Oien D. Metabolic/Bariatric Surgery Worldwide 2008. *Obesity Surgery* 2009;19(12):1605-11.
2. Samuel I, Mason E, Renquist K, Huang Y, Zimmerman M, Jamal M. Bariatric surgery trends: an 18-year report from International Bariatric Surgery Registry. *American Journal of Surgery* 2006;192(2):657-62.
3. Christou N, Efthimiou E. Bariatric surgery waiting times in Canada. *Canadian Journal of Surgery* 2009;52(3):229-34.
4. Birch D, Vu L, Karmali S, Stoklossa C, Sharma A. Medical tourism in bariatric surgery. *American Journal of Surgery* 2010;199:604-8.
5. Martin A, Klemensberg J, Klein L, Urbach D, Bell C. Comparison of public and private bariatric surgery services in Canada. *Canadian Journal of Surgery* 2011;54(2):154-60.
6. Silva M. Mortality of morbidly obese patients on the waiting list for bariatric surgery. *Obesity Surgery* 2006;16:401-2.
7. Bariatric surgery: an evidence-based analysis. Ontario Health Technology Assessment Series [Internet]. 2005; 5(1).
8. Ministry of Health and Long-term Care News: Ontario Improves Access to Bariatric Surgery [press release]. 2009.
9. Birch D, Vu L, Karmali, Stoklossa C, Sharma A. Medical tourism in bariatric surgery. *American Journal of Surgery* 2010;199:604-8.
10. Scales D, Guan J, Martin C, Redelmeier D. Administrative data accurately identified intensive care unit admissions in Ontario. *Journal of Clinical Epidemiology* 2006;59:802-7.
11. Smith N, Weiner J. Applying population-based case mix adjustment in managed care: the Johns Hopkins Ambulatory Care Group system. *Managed Care Quarterly* 1994;2(3):21-34.
12. Carlsson L, Borjesson U, Edgren L. Patient-based "burden-of-illness" in Swedish primary health care. Applying the Johns Hopkins ACG case-mix system in a retrospective study of electronic patient records. *International Journal of Health Planning and Management* 2002;17(3):269-82.

- 1  
2  
3 13. Woolston A, Tu Y-K, Gilthorpe M, Baxter P. Measuring the impact of  
4 collinearity in epidemiological research. *International Journal of Statistics and*  
5 *Probability* 2013;2(2):1-11.  
6
- 7  
8 14. Hollenbeak C, Rogers A, Barrus B, Wadiwala I, Cooney R. Surgical volume  
9 impacts bariatric surgery mortality: a case for centers of excellence. *Surgery*  
10 2008;144(5):736-43.  
11
- 12 15. Nguyen N, Hohmann S, Slone J, Varela E, Smith B, Hoyt D. Improved bariatric  
13 surgery outcomes for Medicare beneficiaries after implementation of the medicare  
14 national coverage determination *Archives of Surgery* 2010;145(1):72-8.  
15
- 16 16. Morton J, Garg T, Nguyen N. Does hospital accreditation impact bariatric surgery  
17 safety? *Annals of Surgery* 2014;260:504-8.  
18
- 19 17. Livingston E. Bariatric surgery outcomes at designated centers of excellence vs  
20 nondesignated programs *Archives of Surgery* 2009;144(4):319-25.  
21
- 22 18. Birkmeyer N, Dimich J, Share D. Michigan Bariatric Surgery Collaborative.  
23 Hospital complication rates with bariatric surgery in Michigan *Journal of the American*  
24 *Medical Association* 2010;304(4):435-42.  
25
- 26 19. Dimick J, Nicholas L, Ryan A, Thumma J, Birkmeyer J. Bariatric Surgery  
27 Complications Before vs After Implementation of a National Policy Restricting Coverage  
28 to Centers of Excellence. *Journal of the American Medical Association* 2013;309(8):792-  
29 9.  
30
- 31 20. Williams J, Young W. A summary of studies on the quality of health care  
32 administrative databases in Canada. *Patterns of health care in Ontario The ICES*  
33 *Practice Atlas* 2nd ed. Ottawa, ON: Canadian Medical Association; 1996. p. 339-45.  
34
- 35 21. Juurink D, Preyra C, Croxford R, Chong A, Austin P, Tu J, et al. Canadian  
36 Institute for Health Information Discharge Abstract Database: A Validation  
37 Study Toronto: Institute for Clinical Evaluative Sciences, 2006.  
38
- 39 22. Concerns raised about Ontario's new regime for bariatric surgery 2010;  
40 182(3):[E153-4 pp.].  
41
- 42 23. Gould J, Ellsmere J, Fanelli R, Hutter M, Jones S, Pratt J, et al. Panel report: best  
43 practices for the surgical treatment of obesity. *Surgical Endoscopy* 2011;25(6):1730-40.  
44
- 45 24. Brethauer S. American society for metabolic and bariatric surgery position  
46 statement on global bariatric healthcare. *Surgery for Obesity Related Diseases*  
47 2011;7:669-71.  
48  
49  
50  
51  
52  
53  
54  
55  
56  
57  
58  
59  
60

**Table 1. Characteristics of the Ontario Bariatric Surgery Cohort before and after program implementation**

| Characteristics                               | Before OBN<br>(n = 5,617) | After OBN<br>(n = 6,896) | Difference <sup>b</sup><br>(95% CI) | P value            |
|-----------------------------------------------|---------------------------|--------------------------|-------------------------------------|--------------------|
| Age (years)<br>Mean [SD]                      | 43.3 [10.3]               | 44.8 [10.4]              | 1.5<br>(1.2, 1.9)                   | <.001 <sup>c</sup> |
| Sex<br>Female                                 | 4551 (81.5)               | 5633 (81.8)              | 0.3%<br>(-1.1%, 1.7%)               | 0.68 <sup>d</sup>  |
| ACG<br>Comorbidity Score                      |                           |                          |                                     |                    |
| ≤2                                            | 135 (2.4)                 | 101 (1.5)                | -                                   | <.001 <sup>d</sup> |
| 3                                             | 3256 (58.0)               | 4039 (58.6)              |                                     |                    |
| 4                                             | 1633 (29.1)               | 2076 (30.1)              |                                     |                    |
| 5                                             | 593 (10.6)                | 680 (9.9)                |                                     |                    |
| Rural residence <sup>e</sup>                  | 971 (17.3)                | 1078 (15.6)              | -1.7% (-3.0%,<br>-0.4%)             | 0.01 <sup>d</sup>  |
| Neighbourhood<br>Income Quintile <sup>f</sup> |                           |                          |                                     |                    |
| 1                                             | 1308 (23.4)               | 1597 (23.2)              | -                                   | 0.47 <sup>d</sup>  |
| 2                                             | 1272 (22.8)               | 1590 (23.1)              |                                     |                    |
| 3                                             | 1136 (20.3)               | 1421 (20.7)              |                                     |                    |
| 4                                             | 1040 (18.6)               | 1321 (19.2)              |                                     |                    |
| 5                                             | 832 (14.9)                | 949 (13.8)               |                                     |                    |
| Procedure<br>RYGB                             | 5378 (95.8)               | 6423 (93.1)              | -2.6% (-3.4%,<br>-1.8%)             | <.001 <sup>d</sup> |
| Centre location                               |                           |                          |                                     |                    |
| In-province                                   |                           |                          |                                     |                    |
| OBN                                           | 1164 (20.7)               | 6216 (90.1)              | -                                   | <.001 <sup>d</sup> |
| Other                                         | 69 (1.2)                  | 212 (3.1)                |                                     |                    |
| Out-of-country                                | 4384 (78.1)               | 467 (6.8)                |                                     |                    |

Abbreviations: OBN, Ontario Bariatric Network; CI, Confidence Interval; RYGB, Roux-en-Y Gastric Bypass; ACG, Adjusted Clinical Group

<sup>a</sup> Data reported as Number (%) unless otherwise indicated

<sup>b</sup> Differences are reported in percent with exception of age where mean difference is reported

<sup>c</sup> p-value given for t test

<sup>d</sup> p-value given for Chi-square test

<sup>e</sup> Rural residence defined as a community size of less than 10,000 population

<sup>f</sup> Income quintile determined based on linking residential postal code to its corresponding dissemination area and then calculating the average income per person in the area. Areas are then ranked and divided into quintiles.



**Table 2. One-year postoperative health services utilization before and after program implementation<sup>a</sup>**

| Outcomes                                                                           | Before OBN<br>(n = 5,617) | After OBN<br>(n = 6,896) | Difference <sup>b</sup><br>(95% CI) | P value            |
|------------------------------------------------------------------------------------|---------------------------|--------------------------|-------------------------------------|--------------------|
| Any hospital services <sup>c</sup>                                                 | 3033 (54.0)               | 3510 (50.1)              | -3% (-4.9%, -1.3%)                  | <.001 <sup>d</sup> |
| Number of days requiring hospital services among persons with ≥ 1 day<br>Mean [SD] | 5.7 [14.1]                | 4.8 [9.5]                | -0.8 (-1.4, -0.2)                   | <.001 <sup>e</sup> |
| Any emergency room visit                                                           | 2778 (49.5)               | 3244 (47.0)              | -2.6% (-4.4%, -0.8%)                | 0.007 <sup>d</sup> |
| Number of emergency visits among persons with ≥ 1 visit<br>Mean [SD]               | 2.5 [2.7]                 | 2.3 [2.3]                | -0.2 (-0.3, -0.1)                   | <.001 <sup>e</sup> |
| Any hospitalization                                                                | 1504 (26.8)               | 1960 (28.4)              | 1.7% (0.7%, 3.2%)                   | 0.04 <sup>d</sup>  |
| Number of hospitalizations among persons with ≥ 1 hospitalization<br>Mean [SD]     | 1.7 [1.4]                 | 1.7 [1.3]                | 0.02 (-0.08, 0.11)                  | 0.99 <sup>e</sup>  |
| Number of days in hospital<br>Mean [SD]                                            | 9.3 [21.0]                | 6.8 [12.6]               | -2.5 (-3.8, -1.2)                   | <.001 <sup>e</sup> |
| Any intensive care stay                                                            | 120 (2.1)                 | 164 (2.4)                | 0.2% (-0.3%, 0.8%)                  | 0.37 <sup>d</sup>  |
| Number of days in ICU among persons requiring an ICU stay<br>Mean [SD]             | 11.1 [20.8]               | 4.4 [9.4]                | -6.7 (-10.3, -3.1)                  | <.001 <sup>e</sup> |
| Any ventilatory support                                                            | 61 (1.1)                  | 71 (1.0)                 | -0.06% (-0.4%, 0.3%)                | 0.76 <sup>d</sup>  |
| Number of ventilated days among persons requiring ventilation<br>Mean [SD]         | 13.1 [24.2]               | 4.3 [6.2]                | -8.8 (-14.7, -2.8)                  | <.001 <sup>e</sup> |
| Any physician assessment                                                           | 429 (7.6)                 | 2218 (32.2)              | 24.5% (23.2%, 25.8%)                | <.001 <sup>d</sup> |
| Number of physician assessments among persons with ≥ 1 visit<br>Mean [SD]          | 1.5 [1.5]                 | 1.2 [0.7]                | -0.3 (-0.4, -0.2)                   | <.001 <sup>e</sup> |
| Reoperation                                                                        | 144 (2.6)                 | 300 (4.4)                | 1.8% (1.2%, 2.4%)                   | <.001 <sup>d</sup> |
| Number of reoperations among persons with ≥ 1 reoperation<br>Mean [SD]             | 2.0 [1.6]                 | 1.3 [0.7]                | -0.6 (-0.8, -0.4)                   | <.001 <sup>e</sup> |
| 30-day mortality                                                                   | 11 (0.2)                  | 9 (0.1)                  | -0.07% (-0.2%, 0.08%)               | 0.36 <sup>d</sup>  |
| 1-year mortality                                                                   | 26 (0.5)                  | 16 (0.2)                 | -0.2% (-0.4%, 0.02%)                | 0.03 <sup>d</sup>  |

Abbreviations: OBN, Ontario Bariatric Network; CI, Confidence Interval; ICU, Intensive Care Unit; SD, Standard Deviation

<sup>a</sup> Data reported as Number (%) unless otherwise indicated

<sup>b</sup> Differences are reported in percent with exception of mean differences

<sup>c</sup> Hospital services = total number of emergency room visits + days in hospital

<sup>d</sup> Based on a Chi-square test

<sup>e</sup> Based on a t test

Table 3. Summary of unadjusted and adjusted estimates of study outcomes

| Outcomes            | Unadjusted RR<br>(95% CI) | P value | Adjusted <sup>a</sup> RR<br>(95% CI) | P value |
|---------------------|---------------------------|---------|--------------------------------------|---------|
| Hospital services   | 0.78 (0.72, 0.84)         | <.001   | 0.83 (0.78, 0.89)                    | <.001   |
| ER visits           | 0.88 (0.83, 0.93)         | <.001   | 0.92 (0.87, 0.97)                    | 0.004   |
| Days in hospital    | 0.76 (0.66, 0.87)         | <.001   | 0.80 (0.70, 0.92)                    | <.001   |
| Hospitalizations    | 1.07 (0.99, 1.15)         | 0.07    | 1.05 (0.98, 1.13)                    | 0.16    |
| Intensive care stay | 0.44 (0.29, 0.67)         | <.001   | 0.53 (0.35, 0.81)                    | 0.003   |
| Ventilatory support | 0.31 (0.17, 0.58)         | <.001   | 0.37 (0.19, 0.71)                    | 0.003   |
| Physician visits    | 3.49 (3.19, 3.83)         | <.001   | 3.50 (3.19, 3.84)                    | <.001   |
| Reoperations        | 1.16 (0.93, 1.45)         | 0.20    | 1.15 (0.92, 1.44)                    | 0.22    |
|                     | Unadjusted OR<br>(95% CI) | P value | Adjusted <sup>b</sup> OR<br>(95% CI) | P value |
| 30-day mortality    | 0.67 (0.28, 1.61)         | 0.37    | 0.62 (0.26, 1.50)                    | 0.29    |
| 1-year mortality    | 0.50 (0.27, 0.93)         | 0.03    | 0.44 (0.23, 0.82)                    | 0.01    |

Abbreviations: RR, Rate Ratio; OR, Odds Ratio; ER, Emergency Room

<sup>a</sup> Adjusted variables included age, sex, procedure, rurality, income quintile, and comorbidity score

<sup>b</sup> Adjusted variables included age and sex

Figure 1: Annual summary of bariatric surgeries based on centre location

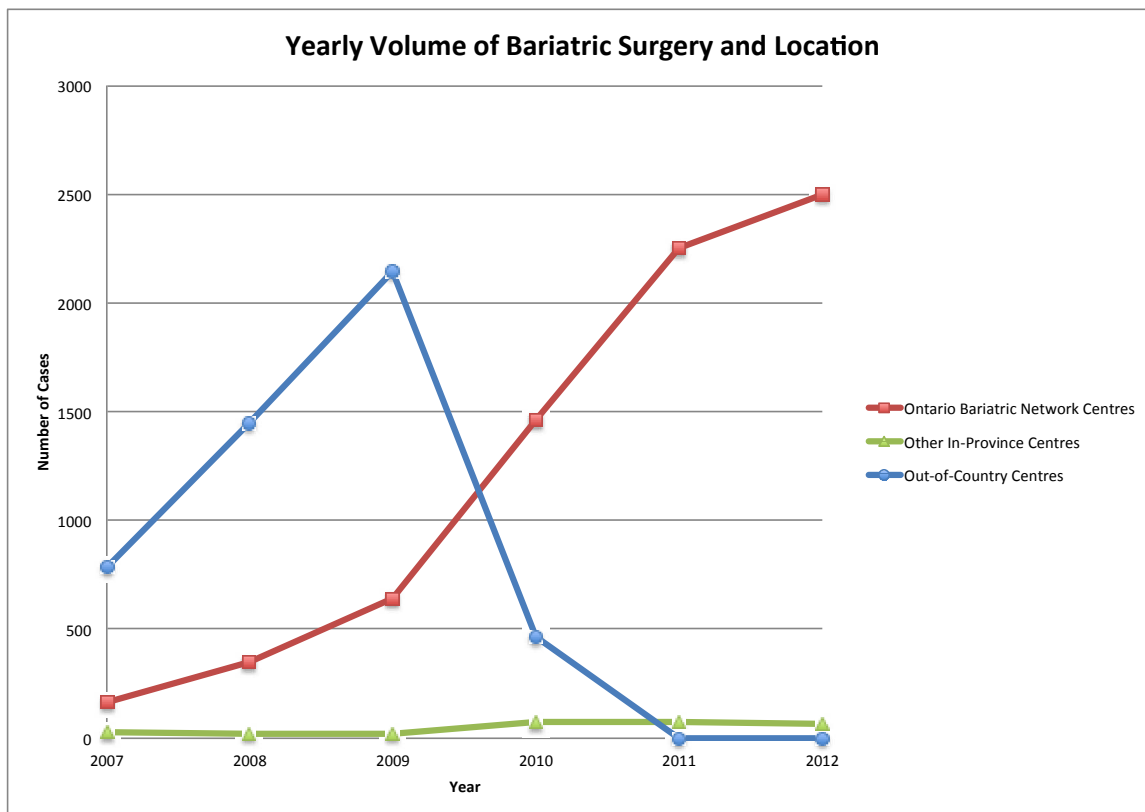

### Author and Study Information

**Funding:** This study was supported through provision of data by the Institute for Clinical Evaluative Sciences (ICES) and through funding support to ICES from an annual grant by the Ministry of Health and Long-Term Care (MOHLTC). The opinions, results and conclusions reported in this paper are those of the authors.

**Author Contributions:** Study conception and design: Drs Elnahas, Urbach. Acquisition of data: Drs Elnahas, Urbach. Analysis and interpretation of data: Elnahas. *Dr. Elnahas had full access to all of the data in the study and takes responsibility for the integrity of the data and the accuracy of the data analysis.* Drafting of manuscript: Drs Elnahas, Jackson, Okrainec, Urbach, Austin. Critical revision of manuscript for important intellectual content: Drs Elnahas, Jackson, Okrainec, Urbach, Austin, Bell. All authors have approved the final version of the manuscript to be published.

**Disclosures:** The authors have no conflicts of interest to disclose.
